# Supplementary material for: Metabolomic investigation of Arthus reaction in a rat model using proton nuclear magnetic resonance (1H NMR) spectroscopy and rapid resolution liquid chromatography (RRLC)
Source: Royal Society of Chemistry journal article supplement (doi:10.1039/c3mb25412g), 2013-02-20
Supplement: c3mb25412g.pdf [file c3mb25412g.pdf]

## Supplementary data

### SUPPLEMENTARY FIGURE CAPTIONS

**Supplementary Fig. S1** Chromatograms (a) of a standard mixture, obtained from serum of (b) a normal control and (c) an AR rat. Peak identification: Asp, Aspartic acid; Glu, Glutamate; Hyp, Hydroxyproline; Asn, Asparagine; Gln, Glutamine; Ser, Serine; Gly, Glycine; Arg, Arginine; Thr, Threonine; His, Histidine; Tau, Taurine; Ala, Alanine; Pro, Proline; Val, Valine; Cys, Cysteine; Met, Methionine; Orn, Ornithine; Ile, Isoleucine; Trp, Tryptophan; Leu, Leucine; Phe, Phenylalanine; Lys, Lysine; and Tyr, Tyrosine

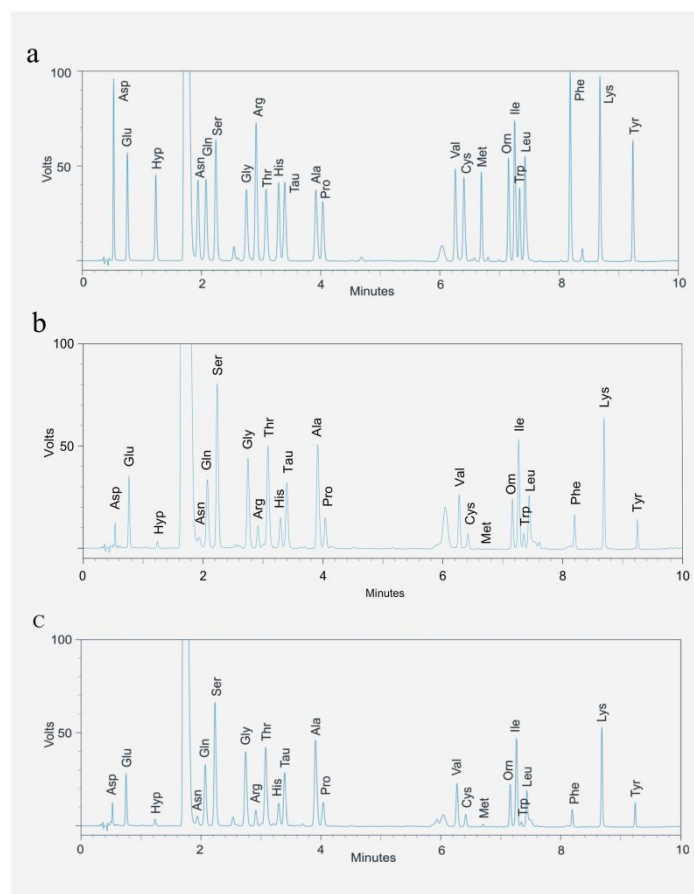

**Supplementary Fig. S1** Chromatograms (a) of a standard mixture, obtained from serum of (b) a normal control and (c) an AR rat. Peak identification: Asp, Aspartic acid; Glu, Glutamate; Hyp, Hydroxyproline; Asn, Asparagine; Gln, Glutamine; Ser, Serine; Gly, Glycine; Arg, Arginine; Thr, Threonine; His, Histidine; Tau, Taurine; Ala, Alanine; Pro, Proline; Val, Valine; Cys, Cysteine; Met, Methionine; Orn, Ornithine; Ile, Isoleucine; Trp, Tryptophan; Leu, Leucine; Phe, Phenylalanine; Lys, Lysine; and Tyr, Tyrosine
